# Supplementary material for: An Interproduct Competition Model Incorporating Branding Hierarchy and Product Similarities Using Store-Level Data
Source: Atypon-hosted journal article supplement (doi:10.1287/mnsc.2014.2039), 2015-02-19
Supplement: mnsc.2014.2039-sm-appendix.pdf [file mnsc.2014.2039-sm-appendix.pdf]

## Web Appendix A: WinBUGS code for the Proposed nested DP Model

```
model ndp {

for (i in 1:N) {          # N = 1511

# <--- for the calibration sample --->

Invol[i]~      dnorm(mu[i],tau);

mu[i]    <-      a[1]*jan[i]      +a[2]*feb[i]      +a[3]*march[i]      +a[4]*april[i]
+a[5]*lnadex1[i]+a[6]*lnpacknum[i]

+a[7]*lnbotoz[i]+a[8]*bottle[i]+a[9]*light[i]+a[10]*amber[i]+a[11]*golden[i]+a[12]*lite[i]
      +b1[1, brand2[i],item2[i]] +b1[2, brand2[i],item2[i]]*lnprice1[i]
      +b1[3, brand2[i],item2[i]]*lndistbn[i] +b1[4, brand2[i],item2[i]]*lnpromo[i]
      +b1[5, brand2[i],item2[i]]*comptn.ndp0[i];

errsqr[i] <- pow(Invol[i]-mu[i], 2);

loglik[i] <- -0.5*log(6.283)+0.5*log(tau)-0.5*tau*pow(Invol[i]-mu[i],2);

dump[i]
weeknum[i]+month[i]+jan[i]+feb[i]+march[i]+april[i]+lnpacknum[i]+lnbotoz[i]+bottle[i]
      +light[i]+amber[i]+golden[i]+ale[i]+lite[i]+reg[i]+lnprice1[i]+item2[i]+comptn.d
p0[i];

# <--- posterior predictive check - PPC --->
Involnew[i] ~ dnorm(mu[i],tau);

          } # i loop ends

# <--- fitted values from the prediction dataset --->
for (ip in 1:Np)      {          # Np = 660

mup[ip] <- a[1]*janp[ip] +a[2]*febp[ip] +a[3]*marchp[ip] +a[4]*aprilp[ip]
      +a[5]*lnadex1p[ip]+a[6]*lnpacknump[ip] +a[7]*lnbotozp[ip]+a[8]*bottlep[ip]
      +a[9]*lightp[ip]+a[10]*amberp[ip]+a[11]*goldenp[ip]+a[12]*litep[ip]
      +b1[1, brand2p[ip],item2p[ip]] +b1[2, brand2p[ip],item2p[ip]]*lnprice1p[ip]
      +b1[3, brand2p[ip],item2p[ip]]*lndistbnp[ip]
      +b1[4, brand2p[ip],item2p[ip]]*lnpromop[ip]
      +b1[5, brand2p[ip],item2p[ip]]*comptn.ndp0p[ip];

errsqr[ip] <- pow(Involp[ip]-mup[ip], 2);

loglikp[ip] <- -0.5*log(6.283)+0.5*log(tau)-0.5*tau*pow(Involp[ip]-mup[ip],2);
```

```

dumppp[ip] <- weeknump[ip]+monthp[ip]+janp[ip]+febp[ip]+marchp[ip]+aprilp[ip]
+lnpacknump[ip]+lnbotozp[ip]+bottlep[ip]+lightp[ip]+amberp[ip]
+goldenp[ip]+alep[ip]+litep[ip]+regp[ip]+lnprice1p[ip]+item2p[ip]
+comptn.dp0p[ip];

# PPC
Involnewp[ip] ~ dnorm(mup[ip],tau)

} # ip loop ends

# < --- define priors --->

a[1:m] ~ dnorm(nu.a[], Tau.a[1:m, 1:m]) # prior for fixed main effects a[]

for ( m1 in 1:m) { nu.a[m1]~ dnorm(0.001, 0.001) }

Tau.a[1:m,1:m] ~ dwish(RR[,],50)
for ( i in 1:m) {
  for ( j in (i+1):m) { RR[i,j]<-0; RR[j,i]<-0 } # j loop ends
  RR[i,i]<- 0.25
} # i loop ends

tau ~ dgamma(0.001,0.001); sig <- 1/tau;

# < --- nDP code begins --->

# < --- let L, L1 be the truncation levels for the no. of cluster sat the brand & SKU levels
# < --- First generate clustering parameters 'theta3' for L x L1 values here:

for (l1 in 1:L1) {
  rq[l1]~dbeta(1,alpha1);
  for (l in 1:L) {
    r[l1, l] ~ dbeta(1, alpha);
    theta3[l1, l, 1:d] ~ dnorm(nu0[], Tau01[1:d, 1:d]) } # l loop ends
} # l1 loop ends

for ( k in 1:d) { nu0[k]~ dnorm(0.001, 0.001) } # k loop ends

Tau01[1:d,1:d]~dwish(RR[,],50)
for ( i in 1:d) {
  for ( j in (i+1):d) { RR[i,j]<-0; RR[j,i]<-0 } # j ends
  RR[i,i]<- 0.25
}

```

```

    } # i ends

# <--- Draw brand level cluster assignments for B=15 brands with an upper bound of L1
groups

for (v in 1:B) {
  latent1[v,2] ~ dcat(q[1:L1]);
  for (l1 in 1:L1) { Memb[v,l1] <- equals(latent1[v,2], l1) }
  } # v loop ends

# <--- let data1 be a cross-list of brands & their SKUs (see data section below)
# <--- Draw SKU level cluster assignments for the n=96 SKUs --->

for (m in 1:n) {
  latent2[m] ~ dcat(pi[latent1[data1[m,2],2],1:L])

  for (d1 in 1:d){
    b1[d1, data1[m,2], data1[m,1]] <- theta3[latent1[data1[m,2],2], latent2[m], d1] }
# d1 ends

  for (l in 1:L) { Memb1[m,l] <- equals(latent2[m],l) }
  } # m loop ends

# <--- Preparing summary stats of how many clusters generated in each iteration
# <--- of the Gibbs sampler: 'Tcluster' & 'Tcluster1'

for (j1 in 1:L) {
  Tmemb1[j1]<-sum(Memb1[,j1])
  Fmemb1[j1]<-step(Tmemb1[j1]-1) } # j1 loop ends
Tcluster1<-sum(Fmemb1[]) # counts number of SKU clusters generated

for (j2 in 1:L1) {
  Tmemb[j2]<-sum(Memb[,j2])
  Fmemb[j2]<-step(Tmemb[j2]-1) } # j2 loop ends
Tcluster<-sum(Fmemb[]) # counts no. of brand clusters generated

# <--- set more priors & hyperpriors ---> #

alpha1 ~ dgamma(a01, b01);
a1 ~ dgamma(0.001, 0.001); b1 ~ dgamma(0.001, 0.001);
tau1 ~ dgamma(2, 1)

### -----
# <--- stick break for the two nested levels:
### -----

```

```

q[1]<-rq[1]
Rq[1] <- log(1-rq[1])

for ( j in 2:(L1-1)) {
    log(q[j]) <- log(rq[j]) + Rq[j-1]
    Rq[j] <- Rq[j-1] + log(1-rq[j])    } # j loop ends

q[L1]<-1-sum(q[1:(L1-1)]) # completes the classification into L1 clusters

# <--- set concentration parm priors and hyperpriors --->#

traps
alpha0 ~ dgamma(a02, b02);      alpha <- 1+alpha0 # to avoid computational
a02 ~ dgamma(0.001, 0.001); b02 ~ dgamma(0.001, 0.001);

# <--- stick breaking L1 times for each of the L1 child DPs --->

for (l1 in 1:L1) {
    pi[l1,1] <- r[l1,1]
    R1[l1,1] <- log(1-r[l1,1])

    for ( j in 2:(L-1)) {
        log(pi[l1,j])<-log(r[l1,j])+ R1[l1,j-1]
        R1[l1,j] <- R1[l1,j-1] + log(1-r[l1,j])
    } # j ends

    pi[l1,L]<-1-sum(pi[l1,1:(L-1)]) # completes assignment into L
clusters

    } # ends 1:L1 loop

#----- nDP part ends here -----#

# <--- summary metrics --->#

# for PPCs
s2new <- pow(sd(lnvolnew[]),2); pval <- step(s2new - s2);
s2newp <- pow(sd(lnvolnewp[]),2); pvalp<- step(s2newp - s2p);

# for non-normalized log-likelihoods

llik <- sum(loglik[]);
llikp <- sum(loglikp[])

rmse <- sqrt(mean(errsq[]))
rmsep <- sqrt(mean(errsqp[]))

```

```

    }      # model statement ends here.
### ----- ###

DATA      # data section starts here

list(L=25, L1=10, B=15, n=96, N=1511, Np=660, d=5,

data1 = structure(.Data=c(1,1,
2,1,
3,1,
...
95,15,
96,15), .Dim=c(96, 2))      ) # list ends

# DATA calibration sample
weeknum[]  item2[] lnprice1[]  lndistbn[]  lnpromo[]  comptn.ndp0[]
comptn.dp0[] brand2[]  lnpacknum[]  lnbotoz[]  bottle[] light[] amber[]
golden[]   ale[]  lite[]  reg[]  lnadx1[]  lnvol[] month[]  jan[]  feb[]
march[]   april[]
1      1      -2.323028707 -0.24098737  0.434385448  0.08966895  0.357309071
1      2.48490665  2.48490665  0      0      1      0      0      1      0
9.599540588  8.881836305  1      1      0      0      0
2      1      -2.319467689 -0.530938454  0.80317185  0.092378322  0.358247345
1      2.48490665  2.48490665  0      0      1      0      0      1      0
9.599540588  8.798454696  1      1      0      0      0
...
END

# DATA holdout Sample
<similar to above>

# INITIAL VALUES
list(tau=3, tau1=2, a01=2, a02=2, b01=1, b02=1, alpha1=4, alpha0=2,
a=c(-0.2912, -0.1733, -0.1869, -0.1041, 0.05896), nu0=c(7.871, -0.5988, 0.7654,
0.1158, -1) )

```

## Web Appendix B - Cluster Identification and Inference

First, some notation. Suppose there are  $n$  units to be clustered. Let  $z$  denote a  $n \times 1$  classification vector whose  $i^{\text{th}}$  component  $z_i$  stores the cluster label for unit  $i$  in any given draw from the Gibbs sampler. Let  $l=1,2,..L$  be the nominal labels of the clusters that emerge from the analysis, some of which may be empty. For our application,  $n$  could be the number of brands (at the brand level) or the number of SKUs (at the SKU level). The algorithm can be summarized as follows:

**Step 1:** Build the posterior pairwise similarity matrix from the MCMC output of the model. The posterior pairwise similarity matrix (henceforth, PSM) is defined as a  $n \times n$  matrix whose every cell  $(i, j)$  displays the probability  $\pi_{ij}$  conditional on data and parameters that units  $i$  and  $j$  come from the same cluster, thus:

$$\pi_{ij} = \Pr(z_i = z_j | \cdot). \quad (\text{B.1})$$

Note in Equation (B.1) that since the PSM is based on pairs of units co-occurring together, any relabeling of clusters does not affect the PSM.

**Step 2:** Maximize the posterior expected adjusted Rand index of the pairwise coincidence loss function to obtain the best partition  $z^{\text{best}}$ .

$$\text{Min}_{z^{\text{best}}} E(|PSM(z^{\text{best}}) - PSM(z^{\text{observed}})|). \quad (\text{B.2})$$

While various methods have been proposed to partition units into clusters in the statistics literature using PSMs, Fritsch and Ickstadt (2009) develop a partitioning method based on maximizing the Posterior Expected Adjusted Rand (PEAR) index and compare it with extant benchmarks. We use PEAR to arrive at the best partitioning based on the data. As a robustness check, we compare the expected loss value with the approaches by Binder (1978) and Dahl (2006) following procedures outlined in Fritsch (2012).

**Step 3:** Collect cluster-specific parameters  $\theta_l$  for  $l=1,2,..L$  and center them to get  $\theta_l^*$  by subtracting the corresponding overall sample mean  $\bar{\theta}$ , thus:

$$\begin{aligned} \theta_l &= \frac{1}{n_l} \sum_{i: z^{\text{best}}=l} \theta_i, \quad i=1,2,..n; \\ \theta_l^* &= \theta_l - \bar{\theta}, \quad l=1,2,..L. \end{aligned} \quad (\text{B.3})$$

Here,  $n_l$  is the number of units belonging to cluster  $l$  under  $z^{\text{best}}$ .

**Step 4:** Compute summaries of  $\theta_1^*$  and perform finite sample inference. By construction, the  $\theta_1^*$  sum to zero. Finally, we compute useful summaries for the values  $\theta_1^*$  by finding the  $\Pr(\theta_1^* < 0)$  or  $\Pr(\theta_1^* > 0)$ . If  $\Pr(\theta_1^* < 0)$  or  $\Pr(\theta_1^* > 0)$  are above or below some threshold (typically 0.95 or 0.90), then we can infer that for cluster  $l$ , the group parameter values  $\theta_1$  consistently cluster in a narrow region distinct from the mean for the sample as a whole.

Thus, we attempt to find if there exists a strong clustering "signal" in the data such that despite some variation in each iteration, on the whole, the clustering implied by the model is consistent with  $z^{best}$ . This post-processing approach represents a compromise between interpretable "hard clustering" groupings exemplified by  $z^{best}$ . and using model averaging techniques to assess the uncertainty involved in the parameter values corresponding to individual clusters (Molitor et al. 2010).

**Web Appendix C: Robustness Checks on the Concentration Parameter Prior**

**Table 1A: Gamma Hyper-parameter specifics and Cluster Composition Overlaps**

| <b>Panel A</b>  |                   |                   |                   |                   |
|-----------------|-------------------|-------------------|-------------------|-------------------|
| <b>Measure</b>  | <b>Gamma(1,1)</b> | <b>Gamma(1,2)</b> | <b>Gamma(2,1)</b> | <b>Gamma(2,2)</b> |
| <b>Mean</b>     | <b>1</b>          | <b>2</b>          | <b>2</b>          | <b>4</b>          |
| <b>Variance</b> | <b>1</b>          | <b>4</b>          | <b>2</b>          | <b>8</b>          |
| <b>Mode</b>     | <b>0</b>          | <b>0</b>          | <b>1</b>          | <b>2</b>          |

  

| <b>Panel B</b>               |                   |                   |                   |                   |
|------------------------------|-------------------|-------------------|-------------------|-------------------|
| <b>% of pairs that match</b> | <b>Gamma(1,1)</b> | <b>Gamma(1,2)</b> | <b>Gamma(2,1)</b> | <b>Gamma(2,2)</b> |
| <b>Gamma(1,1)</b>            |                   |                   |                   |                   |
| <b>Gamma(1,2)</b>            | 93.38%            |                   |                   |                   |
| <b>Gamma(2,1)</b>            | 89.22%            | 90.93%            |                   |                   |
| <b>Gamma(2,2)</b>            | 89.17%            | 90.71%            | 94.79%            |                   |
| <b>Gamma(a,b)</b>            | 91.89%            | 94.48%            | 91.01%            | 91.41%            |

**Table 2A: Summaries of Parameters of Interest from the 5 Models tested**

| Panel A                                                  | Models with Different Priors on $\alpha$ at the brand & SKU levels |                       |                       |                         |                         |
|----------------------------------------------------------|--------------------------------------------------------------------|-----------------------|-----------------------|-------------------------|-------------------------|
| Measure                                                  | Gamma(1,1)                                                         | Gamma(1,2)            | Gamma(2,1)            | Gamma(2,2)              | Gamma(a,b)              |
| <b>Posterior Mean<br/>[95% Credible Interval]</b>        |                                                                    |                       |                       |                         |                         |
| <b>Brand level</b>                                       |                                                                    |                       |                       |                         |                         |
| <b>Concentration<br/>(<math>\alpha</math>) parameter</b> | 2.79<br>[1.2, 5.19]                                                | 1.72<br>[0.57, 3.5]   | 1.43<br>[0.53, 2.79]  | 1.31<br>[0.48, 2.74]    | 1.55<br>[0.24, 3.91]    |
| <b>Observed<br/>#Clusters</b>                            | 4.38<br>[4, 5]                                                     | 4.14<br>[4, 5]        | 5.04<br>[5, 6]        | 4.35<br>[4, 5]          | 4.19<br>[4, 5]          |
| <b>SKU level</b>                                         |                                                                    |                       |                       |                         |                         |
| <b>Concentration<br/>(<math>\alpha</math>) parameter</b> | 7.57<br>[5.25, 10.2]                                               | 6.87<br>[4.73, 10.09] | 6.39<br>[4.21, 9.51]  | 5.18<br>[3.57, 7.93]    | 11.66<br>[7.88, 16.23]  |
| <b>Observed<br/>#Clusters</b>                            | 21.66<br>[19, 24]                                                  | 21.27<br>[18, 24]     | 22.55<br>[20, 25]     | 20.68<br>[18, 24]       | 23.06<br>[20, 25]       |
| <b>RMSE</b>                                              | 0.18<br>[0.17, 0.18]                                               | 0.18<br>[0.17, 0.18]  | 0.18<br>[0.17, 0.18]  | 0.18<br>[0.17, 0.18]    | 0.18<br>[0.17, 0.18]    |
| <b>RMSE (holdout)</b>                                    | 0.85<br>[0.75, 0.96]                                               | 0.82<br>[0.73, 0.94]  | 0.56<br>[0.51, 0.60]  | 0.72<br>[0.68, 0.78]    | 0.58<br>[0.54, 0.62]    |
| <b>Avg LogLikelihood</b>                                 | 479.7<br>[452.7, 501.2]                                            | 489.2<br>[465, 511.9] | 470.8<br>[444.3, 495] | 473.8<br>[447.4, 498.1] | 479.2<br>[452.9, 500.7] |

| Panel B                                                       | Posterior Summaries of Random Parameter Estimates |                                 |                                  |                                 |                                  |
|---------------------------------------------------------------|---------------------------------------------------|---------------------------------|----------------------------------|---------------------------------|----------------------------------|
| Measure                                                       | Gamma(1,1)                                        | Gamma(1,2)                      | Gamma(2,1)                       | Gamma(2,2)                      | Gamma(a,b)                       |
| <b>Average of Posterior Means (Std Deviation)<br/>[Range]</b> |                                                   |                                 |                                  |                                 |                                  |
| Random Effect                                                 | 9.69 (0.6)<br>[8.66, 11.23]                       | 9.76 (0.58)<br>[8.72, 11.16]    | 9.42 (0.67)<br>[8.15, 11.2]      | 9.43 (0.66)<br>[8.06, 11.1]     | 9.6 (0.62)<br>[8.5, 11.13]       |
| Price Elasticity                                              | -0.01 (0.04)<br>[-0.11, 0.16]                     | -0.06 (0.04)<br>[-0.13, 0.12]   | -0.03 (0.04)<br>[-0.13, 0.13]    | -0.05 (0.03)<br>[-0.12, 0.11]   | -0.11 (0.05)<br>[-0.24, 0.09]    |
| Distribution Elasticity                                       | 0.86 (0.2)<br>[0.23, 1.4]                         | 0.91 (0.28)<br>[0.18, 1.62]     | 0.81 (0.13)<br>[0.27, 1.15]      | 0.8 (0.15)<br>[0.28, 1.19]      | 0.84 (0.19)<br>[0.26, 1.32]      |
| Promotion Elasticity                                          | 0.12 (0.05)<br>[0.03, 0.32]                       | 0.12 (0.05)<br>[0.02, 0.31]     | 0.12 (0.05)<br>[0.02, 0.34]      | 0.12 (0.05)<br>[0.03, 0.32]     | 0.12 (0.05)<br>[0.03, 0.31]      |
| Competition Response                                          | -0.001 (0.03)<br>[-0.095, 0.097]                  | 0.001 (0.03)<br>[-0.091, 0.101] | -0.003 (0.03)<br>[-0.103, 0.096] | 0.001 (0.03)<br>[-0.098, 0.095] | -0.002 (0.03)<br>[-0.113, 0.095] |
